# Supplementary material for: Comparing Ictal Cardiac Autonomic Changes in Patients with Frontal Lobe Epilepsy and Temporal Lobe Epilepsy by Ultra-Short-Term Heart Rate Variability Analysis
Source: MDPI journal article supplement (doi:10.3390/medicina57070666), 2021-06-28
Supplement: s1 [file s1]

**Table S1.** Post-hoc Tukey-Kramer multiple comparison tests for HRV parameters between FLE and TLE groups.

| HRV parameter | Type      | Pairs             | Mean difference | TK HSD         | Significance |
|---------------|-----------|-------------------|-----------------|----------------|--------------|
| mean RRI      | FLE group | <b>Pre-ictal</b>  | <b>233.0795</b> | <b>14.495</b>  | <b>*</b>     |
|               |           | <b>Pre-post</b>   | <b>146.5400</b> | <b>9.113</b>   | <b>*</b>     |
|               |           | <b>Ictal-post</b> | <b>86.5395</b>  | <b>5.3817</b>  | <b>*</b>     |
|               | TLE group | <b>Pre-ictal</b>  | <b>251.7075</b> | <b>28.9238</b> | <b>*</b>     |
|               |           | <b>Pre-post</b>   | <b>153.5154</b> | <b>17.6405</b> | <b>*</b>     |
|               |           | <b>Ictal-post</b> | <b>98.1921</b>  | <b>11.2833</b> | <b>*</b>     |
| SDNN          | FLE group | <b>Pre-ictal</b>  | <b>25.4096</b>  | <b>4.6636</b>  | <b>*</b>     |
|               |           | Pre-post          | 11.8412         | 2.1733         | n.s          |
|               |           | Ictal-post        | 13.5684         | 2.4903         | n.s          |
|               | TLE group | <b>Pre-ictal</b>  | <b>17.1837</b>  | <b>5.8276</b>  | <b>*</b>     |
|               |           | Pre-post          | 6.5678          | 2.2274         | n.s          |
|               |           | Ictal-post        | 10.6159         | 3.6002         | n.s          |
| RMSSD         | FLE group | Pre-ictal         | 10.8694         | 2.7085         | n.s          |
|               |           | Pre-post          | 1.8342          | 0.4571         | n.s          |
|               |           | Ictal-post        | 12.7036         | 3.1656         | n.s          |
|               | TLE group | Pre-ictal         | 5.7766          | 2.6598         | n.s          |
|               |           | Pre-post          | 3.8408          | 1.7685         | n.s          |
|               |           | <b>Ictal-post</b> | <b>9.6174</b>   | <b>4.4283</b>  | <b>*</b>     |
| normalized LF | FLE group | <b>Pre-ictal</b>  | <b>10.482</b>   | <b>5.392</b>   | <b>*</b>     |
|               |           | Pre-post          | 0.897           | 0.462          | n.s          |
|               |           | <b>Ictal-post</b> | <b>11.379</b>   | <b>5.853</b>   | <b>*</b>     |
|               | TLE group | Pre-ictal         | 3.423           | 3.253          | n.s          |
|               |           | Pre-post          | 2.923           | 2.778          | n.s          |
|               |           | Ictal-post        | 0.500           | 0.475          | n.s          |
| normalized HF | FLE group | Pre-ictal         | 4.1903          | 2.2561         | n.s          |
|               |           | Pre-post          | 4.0467          | 2.1788         | n.s          |
|               |           | Ictal-post        | 0.1436          | 0.0773         | n.s          |
|               | TLE group | <b>Pre-ictal</b>  | <b>4.6807</b>   | <b>4.6567</b>  | <b>*</b>     |
|               |           | <b>Pre-post</b>   | <b>7.5185</b>   | <b>7.4798</b>  | <b>*</b>     |
|               |           | Ictal-post        | 2.8377          | 2.8232         | n.s          |
| LF/HF ratio   | FLE group | <b>Pre-ictal</b>  | <b>2.720</b>    | <b>6.744</b>   | <b>*</b>     |
|               |           | Pre-post          | 0.624           | 1.548          | n.s          |
|               |           | <b>Ictal-post</b> | <b>2.096</b>    | <b>5.196</b>   | <b>*</b>     |
|               | TLE group | <b>Pre-ictal</b>  | <b>0.983</b>    | <b>4.501</b>   | <b>*</b>     |
|               |           | Pre-post          | 0.466           | 2.133          | n.s          |
|               |           | Ictal-post        | 0.517           | 2.368          | n.s          |

The critical q-value for an alpha level of 0.05 was 4.0385. Mean RRI, mean of inter-beat intervals between successive heartbeats; SDNN, a standard deviation of the normal-to-normal interval; RMSSD, square root of the mean of the sum of the squares of differences between consecutive normal-to-normal intervals; normalized LF, the relative power of the frequency band (0.04-0.15 Hz); normalized HF, the relative power of the high-frequency band (0.15-0.4 Hz); LF/HF, a ratio of low- to high-frequency power; \* Bold indicates p-value less than 0.05.
